# Supplementary material
Source: PubMed Central journal article supplement (PMC3056579)
Supplement: supp_jn.110.133769_nut133769_F01.pdf [file supp_jn.110.133769_nut133769_F01.pdf]

Online Supporting Material

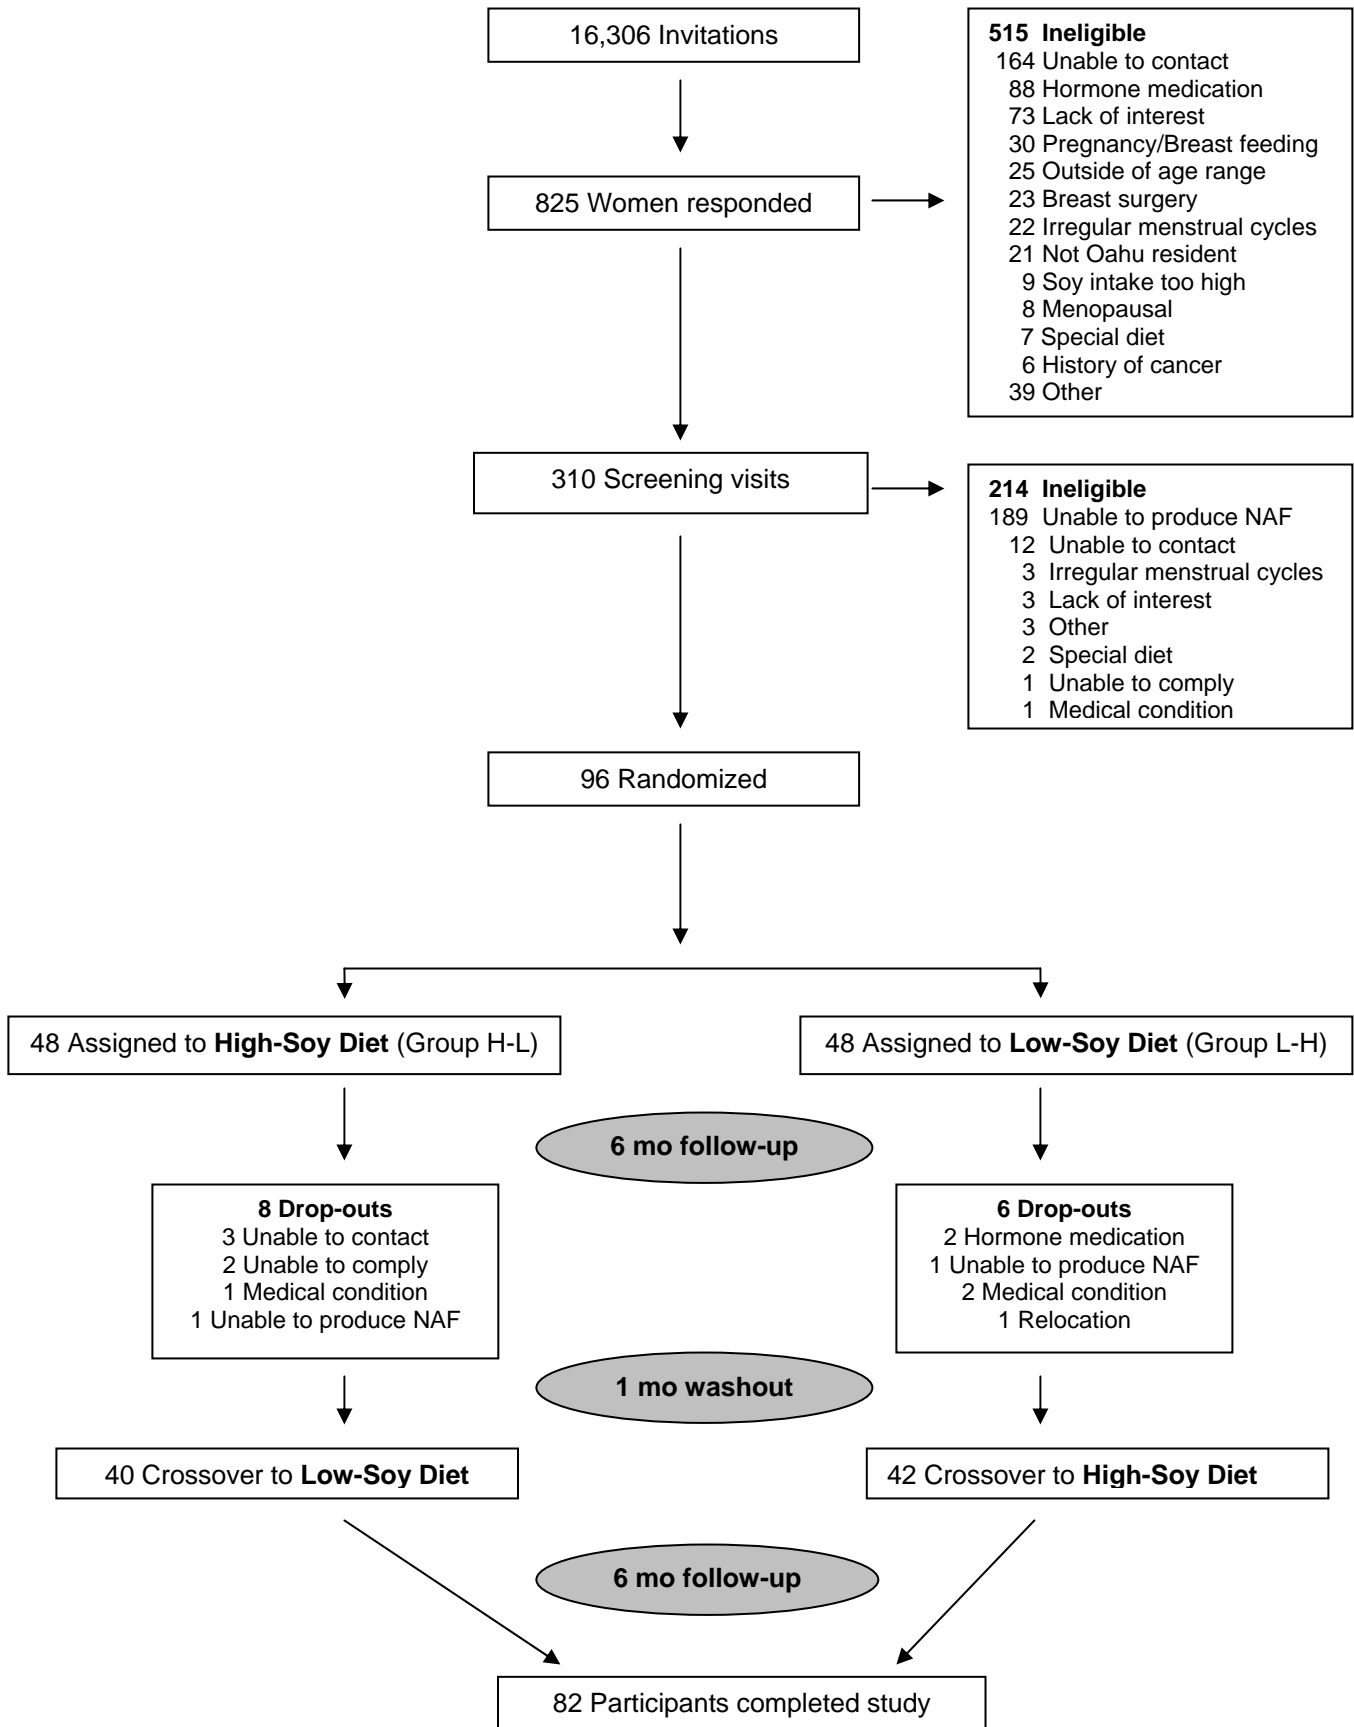

Supplemental Figure 1. Study design for randomized soy intervention
