# Supplementary material
Source: PubMed Central journal article supplement (PMC3056579)
Supplement: supp_jn.110.133769_nut133769_T01.pdf [file supp_jn.110.133769_nut133769_T01.pdf]

**Supplemental Table 1.** Overview of study activities for soy intervention

| <i>Activity/mo</i>                 | Baseline | 1 | 2 | 3 | 4 | 5 | 6 | Washout | 8 | 9 | 10 | 11 | 12 | 13 |
|------------------------------------|----------|---|---|---|---|---|---|---------|---|---|----|----|----|----|
| <b>Group H-L<sup>1</sup></b>       |          |   |   |   |   |   |   |         |   |   |    |    |    |    |
| <i>High soy diet</i>               |          | x | x | x | x | x | x |         |   |   |    |    |    |    |
| <i>Low soy diet</i>                |          |   |   |   |   |   |   |         | x | x | x  | x  | x  | x  |
| <b>Group L-H<sup>1</sup></b>       |          |   |   |   |   |   |   |         |   |   |    |    |    |    |
| <i>High soy diet</i>               |          |   |   |   |   |   |   |         | x | x | x  | x  | x  | x  |
| <i>Low soy diet</i>                |          | x | x | x | x | x | x |         |   |   |    |    |    |    |
| <b>Both groups</b>                 |          |   |   |   |   |   |   |         |   |   |    |    |    |    |
| <i>NAF collection</i>              | x        |   |   | x |   |   | x | x       |   |   | x  |    |    | x  |
| <i>Serum collection</i>            | x        |   |   |   |   |   | x |         |   |   |    |    |    | x  |
| <i>Urine collection</i>            | x        | x |   | x |   |   | x | x       | x |   | x  |    |    | x  |
| <i>24-hour recalls<sup>2</sup></i> | x        | x |   | x |   | x |   |         | x |   | x  |    |    | x  |

<sup>1</sup> Group **H-L**: high-soy diet first, then low-soy diet; Group **L-H**: low-soy diet first, then high-soy diet.

<sup>2</sup> Unannounced 24-hour recalls were conducted at baseline and in scheduled months.
